# Supplementary material for: Cytotoxic Potential of Novel Quinoline Derivative: 11-(1,4-Bisaminopropylpiperazinyl)5-methyl-5H-indolo[2,3-b]quinoline against Different Cancer Cell Lines via Activation and Deactivation of the Expression of Some Proteins
Source: MDPI journal article supplement (doi:10.3390/ijms241814336), 2023-09-20
Supplement: s1 [file s1]

---

## Supporting information

# Cytotoxic Potential of Novel Quinoline Derivative 11-(1,4-Bisaminopropylpiperazinyl)-5-Methyl-5H-indolo[2,3-b]quinoline against Different Cancer Cell Lines via Activation and Deactivation of the Expression of Some Proteins

Sara Fathy Abd Elrahman <sup>1</sup>, Abdullah A. S. Ahmed <sup>1</sup>, Doaa Abd Elsatar <sup>1</sup>, Salma Elkady <sup>1</sup>, Amira Elgendy <sup>1</sup>, Fatma Alnakeeb <sup>1</sup>, Elshaymaa I. Elmongy <sup>2</sup>, Hanan A. Henidi <sup>3,\*</sup>, Saad M. El-Gendy <sup>4</sup>, Ibrahim El Tantawy El Sayed <sup>1,\*</sup>, Ahmed A. El-Gokha <sup>1</sup> and Mabrouk Attia Abd Eldaim <sup>5</sup>

- <sup>1</sup> Department of Chemistry, Faculty of Science, Menoufia University, Shibin El-Kom 32511, Egypt; sara.fathy.mostafa@gmail.com (S.F.A.E.); chemist\_abdullah\_2009@yahoo.com (A.A.S.A.); douaaabdelatar94@gmail.com (D.A.E.); salmaelkady16@yahoo.com (S.E.); amirajulita765@gmail.com (A.E.); tamtamalnakeeb@gmail.com (F.A.); aelgokha@yahoo.com (A.A.E.-G.)
- <sup>2</sup> Department of Pharmaceutical Chemistry, Faculty of Pharmacy, Helwan University, Cairo 11795, Egypt; shaymaa.taha@pharm.helwan.edu.eg
- <sup>3</sup> Research Department, Health Sciences Research Center, Princess Nourah bint Abdulrahman University, Riyadh 84428, Saudi Arabia
- <sup>4</sup> Department of Cancer Biology, National Cancer Institute, Cairo University, Cairo 11562, Egypt; saadelgendy2004@yahoo.com
- <sup>5</sup> Department of Biochemistry and Chemistry of Nutrition, Faculty of Veterinary Medicine, Menoufia University, Shibin El-Kom 32511, Egypt; mabroukattia@vet.menofia.edu.eg
- \* Correspondence: hahenidi@pnu.edu.sa (H.A.H.); ibrahimtantawy@science.menofia.edu.eg (I.E.T.E.S.)

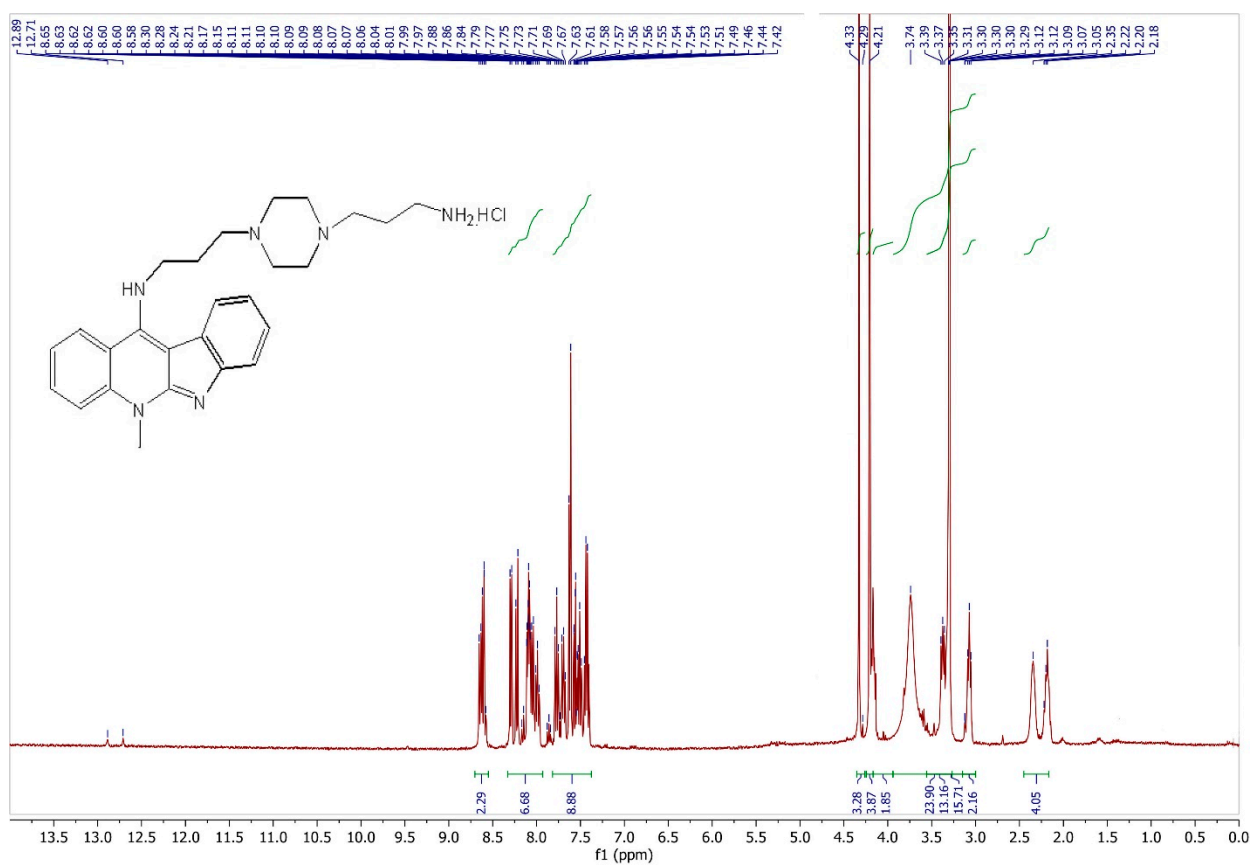

<sup>1</sup>H NMR of 11(1,4-Bisaminopropylpiperazinyl) indoloquinoline (BAPPN)

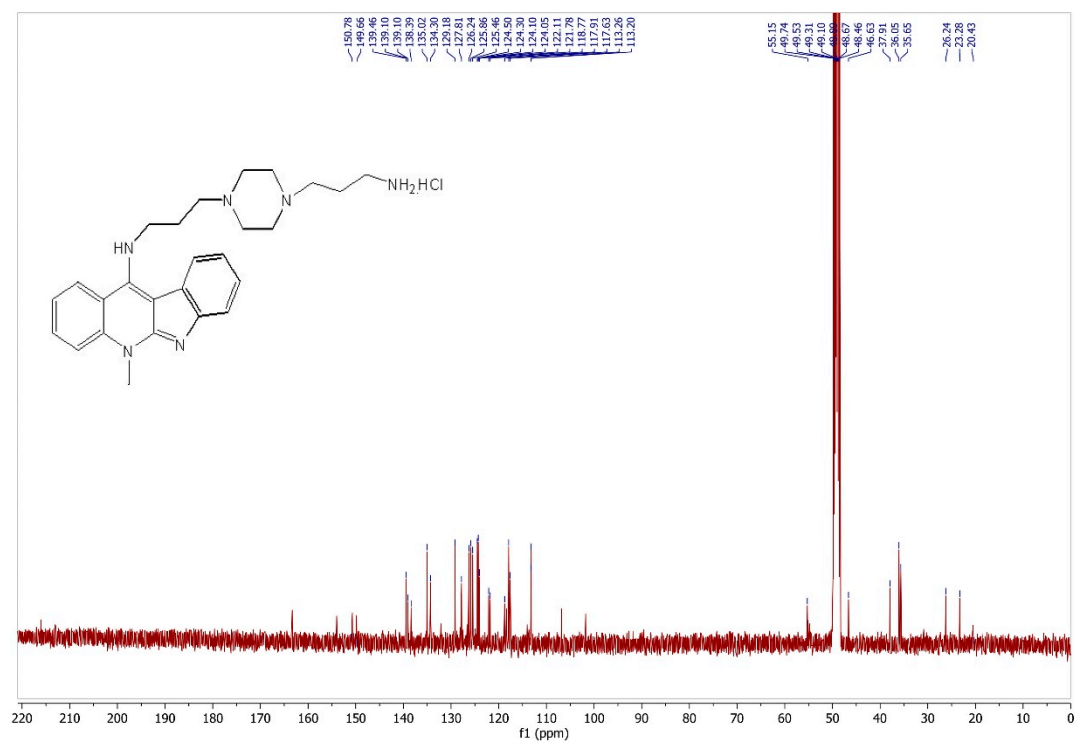

<sup>13</sup>C NMR of 11(1,4-Bisaminopropylpiperazinyl) indoloquinoline (BAPPN)
